# Supplementary material
Source: PubMed Central journal article supplement (PMC3567309)
Supplement: NIHMS423652-supplement-Supplementary_Information.pdf [file NIHMS423652-supplement-Supplementary_Information.pdf]

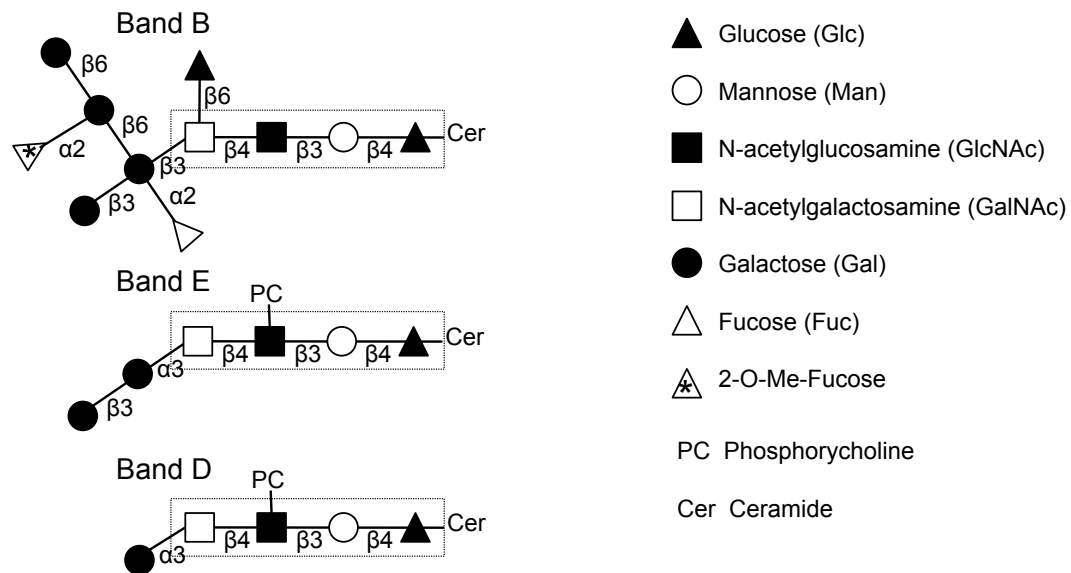

**Figure S1. Glycolipid receptor of Cry5B.**

Top, One of the glycolipid receptors of Cry5B, previously identified as band B (Griffitts et al., 2001). Middle, a more minimal glycan receptor of Cry5B, previously identified as band E (Griffitts et al., 2001). Bottom, glycan previously identified as band D (Griffitts et al., 2001), which is not bound by Cry5B. The arthroseries tetrasaccharide core is boxed in dotted lines.

**Table S1.** Data collection, phasing and refinement statistics

|                                                     | Native                           | SeMet                            |
|-----------------------------------------------------|----------------------------------|----------------------------------|
| <b>Data collection</b>                              |                                  |                                  |
| Space group                                         | P6 <sub>3</sub>                  | P6 <sub>3</sub>                  |
| Cell dimensions                                     |                                  |                                  |
| <i>a</i> , <i>b</i> , <i>c</i> (Å)                  | a=b=115.5<br>c=110.3             | a=b=114.5<br>c=111.0             |
| $\alpha$ , $\beta$ , $\gamma$ (°)                   | $\alpha=\beta=90$ , $\gamma=120$ | $\alpha=\beta=90$ , $\gamma=120$ |
|                                                     |                                  | <i>Peak</i>                      |
| Wavelength (Å)                                      | 0.97930                          | 0.97865                          |
| Resolution (Å)                                      | 50.00-2.30 (2.34-<br>2.30)       | 50.00-3.15 (3.20-<br>3.15)       |
| <i>R</i> <sub>merge</sub>                           | 15.3 (70.5)                      | 20.6 (75.5)                      |
| <i>I</i> / $\sigma$ <sub><i>I</i></sub>             | 17.5 (3.2)                       | 41.9 (7.3)                       |
| Completeness (%)                                    | 99.9 (100)                       | 100 (100)                        |
| Redundancy                                          | 6.3 (6.3)                        | 42.7 (35.9)                      |
| <b>Refinement</b>                                   |                                  |                                  |
| Resolution (Å)                                      | 39.9-2.3                         |                                  |
| No. reflections                                     | 37,191                           |                                  |
| <i>R</i> <sub>work</sub> / <i>R</i> <sub>free</sub> | 0.173/0.218                      |                                  |
| No. atoms                                           |                                  |                                  |
| Protein                                             | 4,624                            |                                  |
| Ligand/ion                                          |                                  |                                  |
| Water                                               | 481                              |                                  |
| B-factors (Å <sup>2</sup> )                         |                                  |                                  |
| Protein                                             | 32.3                             |                                  |
| Ligand/ion                                          |                                  |                                  |
| Water                                               | 33.0                             |                                  |
| R.m.s deviations                                    |                                  |                                  |
| Bond lengths (Å)                                    | 0.008                            |                                  |
| Bond angles (°)                                     | 1.132                            |                                  |

\*Highest resolution shell is shown in parenthesis.
